# Supplementary material
Source: publisher site journal article supplement (https://www.dovepress.com/get_supplementary_file.php?f=344715.docx)
Supplement: Supplementary file 1 [file get_supplementary_file.php]

Table 1: cut-off points of each child development milestone to diagnose developmental delay by age category

| Age in month | Area | Developmental delay | Needs monitoring | Normal development |
| --- | --- | --- | --- | --- |
| 12 month | Communication | < 16 | 16-30 | >30 |
| Gross motor | < 21 | 21-35 | >35 |
| Fine motor | < 34 | 34-42 | >42 |
| Problem solving | < 27 | 27-38 | >38 |
| Personal social | < 22 | 22-34 | >34 |
| 13 month 0 day – 14 month 30 days | Communication | < 17 | 17-31 | >31 |
| Gross motor | < 26 | 26-39 | >39 |
| Fine motor | < 23 | 23-35 | >35 |
| Problem solving | < 23 | 23-34 | >34 |
| Personal social | < 23 | 23-35 | >35 |
| 15 month 0 day – 16 month 30 days | Communication | < 17 | 17-30 | >30 |
| Gross motor | < 38 | 38-47 | >47 |
| Fine motor | < 32 | 32-42 | >42 |
| Problem solving | < 31 | 31-41 | >41 |
| Personal social | < 26 | 26-37 | >37 |
| 17 month 0 day – 18 month 30 days | Communication | < 13 | 13-30 | >30 |
| Gross motor | < 37 | 37-41 | >41 |
| Fine motor | < 34 | 34-43 | >43 |
| Problem solving | < 26 | 26-36 | >36 |
| Personal social | < 27 | 27-32 | >32 |
| 19 month 0 day – 20 month 30 days | Communication | < 21 | 21-34 | >34 |
| Gross motor | < 40 | 40-47 | >47 |
| Fine motor | < 36 | 36-44 | >44 |
| Problem solving | <29 | 29-38 | >38 |
| Personal social | < 33 | 33-42 | >42 |
| 21 month 0 day – 22 month 30 days | Communication | < 13 | 13-30 | >30 |
| Gross motor | < 28 | 28-39 | >39 |
| Fine motor | < 30 | 30-39 | >39 |
| Problem solving | < 29 | 29-39 | >39 |
| Personal social | < 30 | 30-40 | >40 |
| 23 month 0 days – 25 month 15 days | Communication | < 25 | 25-37 | >37 |
| Gross motor | < 38 | 38-46 | >46 |
| Fine motor | < 35 | 35-44 | >44 |
| Problem solving | < 30 | 30-44 | >44 |
| Personal social | < 32 | 32-41 | >41 |
| 25 month 16 days – 28 month 15 days | Communication | < 24 | 24-37 | >37 |
| Gross motor | < 28 | 28-39 | >39 |
| Fine motor | < 18 | 18-31 | >31 |
| Problem solving | < 28 | 28-38 | >38 |
| Personal social | < =25 | 26-36 | >36 |
| 28 month 16 days – 31 month 15 days | Communication | <= 33 | 33-43 | >43 |
| Gross motor | < =36 | 37-46 | >46 |
| Fine motor | < =19 | 20-33 | >33 |
| Problem solving | < =27 | 28-37 | >37 |
| Personal social | <= 32 | 32-42 | >42 |
| 31 month 16 days – 34 month 15 days | Communication | < =25 | 26-36 | >36 |
| Gross motor | < 35 | 35-44 | >44 |
| Fine motor | < 12 | 12-23 | >23 |
| Problem solving | < 27 | 28-43 | >43 |
| Personal social | < =29 | 30-40 | >40 |
| 34 month 16 days – 38 month 30 days | Communica3tion | < =31 | 32-42 | >42 |
| Gross motor | < =37 | 38-46 | >46 |
| Fine motor | < 18 | 19-32 | >32 |
| Problem solving | < =30 | 31-41 | >41 |
| Personal social | < =35 | 36-44 | >45 |
| 39 month 0 day – 44 months 30 days | Communication | < 27 | 27-38 | >38 |
| Gross motor | < =36 | 37-45 | >45 |
| Fine motor | < 20 | 20-34 | >34 |
| Problem solving | < =28 | 29-40 | >40 |
| Personal social | <= 31 | 32-42 | >42 |
| 45 month 0 day – 50 month 30 days | Communication | < 31 | 31-42 | >42 |
| Gross motor | < =32 | 33-43 | >43 |
| Fine motor | < 16 | 16-31 | >31 |
| Problem solving | < =31 | 32-42 | >42 |
| Personal social | < 27 | 27-37 | >37 |
| 51month 0 day – 56 months 30 days | Communication | < 32 | 32-43 | >43 |
| Gross motor | < =35 | 36-44 | >44 |
| Fine motor | < 17 | 17-32 | >32 |
| Problem solving | < 28 | 29-39 | >39 |
| Personal social | < =32 | 33-43 | >43 |
| 57month 0, day -59 month 0 day | Communication | < 33 | 34-43 | >43 |
| Gross motor | < 31 | 31-41 | >41 |
| Fine motor | < 27 | 27-39 | >39 |
| Problem solving | < 30 | 30-41 | >41 |
| Personal social | < 39 | 39-47 | >47 |
